# Supplementary material
Source: Springer Nature journal article supplement (https://www.springermedizin.de/resource/supplementary/12885_2013_4354_MOESM2_ESM.pdf/9466088)
Supplement: MOESM2 [file 9466088]

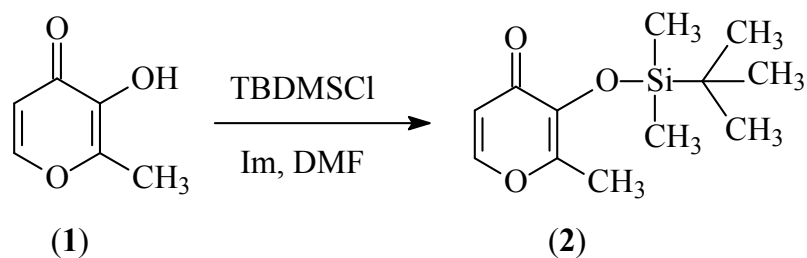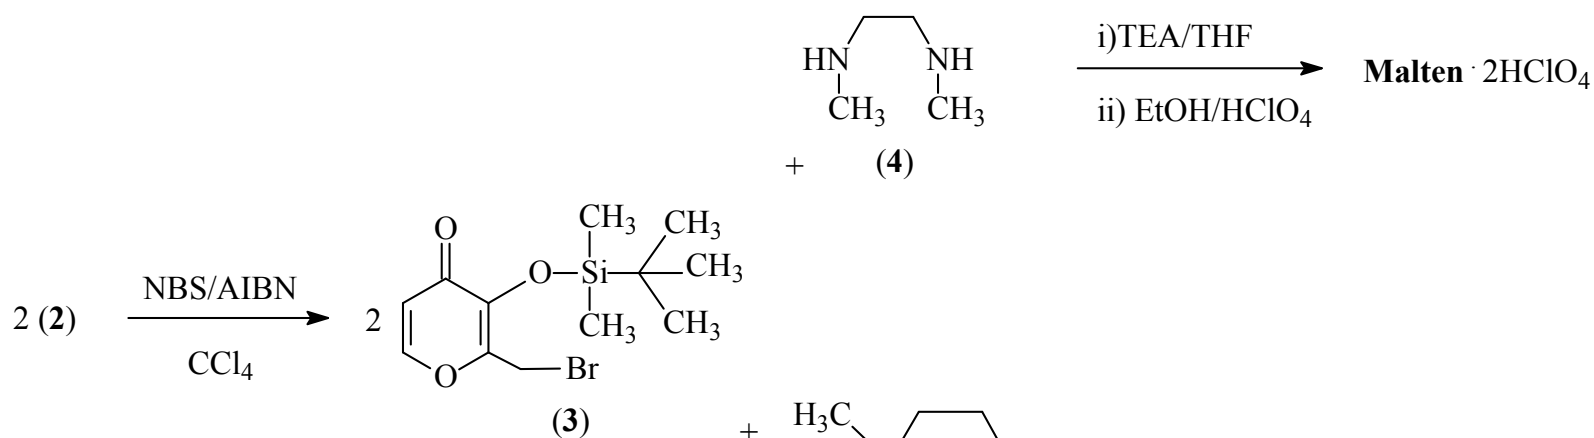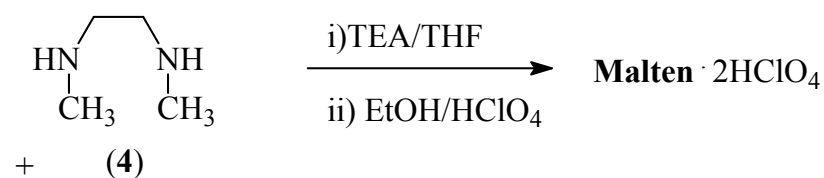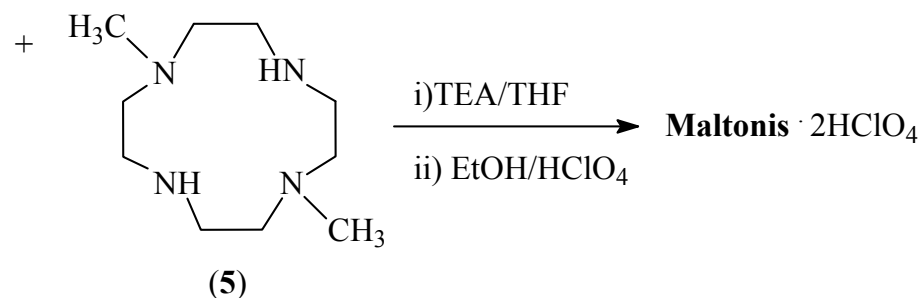

## Additional file 2

Synthetic pathway to obtain Malten and Maltonis. Maltol (1), appropriately protected (2) and activated (3), was reacted with the polyamine (4) or (5) in THF in the presence of triethylamine (TEA) as a base. The treatment with 10% perchloric acid ethanol solution allows the simultaneous deprotection of the hydroxyl function and the cleansing of compounds thus avoiding tedious and expensive chromatographic purifications. Both compounds are obtained as hydroperchlorate white solid salt.
